# Supplementary material
Source: PubMed Central journal article supplement (PMC4550566)

## Supplemental Materials and Methods

### *Generation of FGF19+ BAC transgenic mouse*

FAH<sup>-/-</sup>Rag2<sup>-/-</sup>Il2rg<sup>-/-</sup>NOD<sup>-/-</sup> ("FRGN") female mice of 3 weeks' age were superovulated via standard intraperitoneal (IP) injection of 5 IU PMSG (Pregnant Mare Serum Gonadotropin) on Day -3, followed on Day -1 with IP injection of 5 IU HCG (Human Chorionic Gonadotropin), and mated with FRGN males on Day 0. Females were checked for vaginal plugs, and those with plugs were sacrificed on Day 0.5 or Day 1, and fertilized oocytes (zygotes) collected. Sixty FRGN zygotes were injected with the FGF19+ BAC vector (1 ug/mL)<sup>1</sup> and implanted into surrogate immune competent mice. Twelve pups were born, of which four harbored the transgene, one of which was used to start the FGF19+ colony.

### *Assessment of non-FGF19 effects of BAC transgene*

Two coding regions (other than FGF19) reside in the BAC transgene, genes CCND1 and ORAOV1 (Fig. S1c). Figure S1d shows the regulation of all three BAC-inserted genes in various conditions. Note that the genes are differentially regulated, suggesting that regulatory elements within the BAC allow for physiologic regulation of these genes similar to FGF19. Also note that in the livers of human hepatocyte repopulated mice, those without the BAC transgene do not express FGF19, but do express gene products of CCND1 and ORAOV1, while mice with the BAC express FGF19, CCND1 and ORAOV1. The latter two gene products are expressed at lower levels compared to the non-transgenic mice, suggesting the BAC does not lead to dysregulated expression of these genes.

### *Bile duct ligation and bile acid infusion*

For the bile duct ligation (BDL), 8 week-old male mice were anesthetized with isoflurane. After laparotomy, the common bile duct was ligated with two sutures then cut between the sutures, and the abdomen closed. Animals were killed after 7 days and tissues collected for analysis.

For the bile acid infusion model, 8-12 week old male mice were anesthetized with isoflurane. A small catheter (MRE10, Braintree, O.D. = 0.010") was introduced into the portal vein such that portal flow was not compromised. The small catheter was attached to a larger catheter (MRE40, O.D. = 0.040"), externalized, and connected to an infusion pump. The

catheter was protected by a spring tether mounted to a lever-arm on a special cage designed for infusions (Harvard Apparatus), allowing mice free movement in the cage and normal access to food and water. Portal vein infusions ran at 200  $\mu$ L per hour, and contained either 0.9% saline (control) or 0.025M Na Taurocholate (Sigma) dissolved in 0.9% saline, and ran for 24 or 48 hours prior to sacrifice.

#### *Intestinal bile acid pool analysis*

Intestines and intestinal contents were collected (between stomach and cecum). The intestines and contents were homogenized in a 5% KOH/95% ethanol solution by heating at 70 C for 4 hours. After subsequent removal of particulate matter, the remaining solution was analyzed for total bile acids using an enzymatic Total Bile Acids Test Kit (Diazyme) and normalizing to animal weight.

#### *Tissue analysis*

Liver, intestine and serum were snap frozen in liquid nitrogen when animals were killed; some liver was fixed in formalin for immunohistochemistry. Body weights were measured immediately prior to killing the mice, and liver weights determined immediately after explantation. Serum FGF 19 levels, quantitative real-time RT-PCR (qPCR) and complete RNA sequencing were performed as noted.

#### *Quantitative real-time RT-PCR (qPCR)*

RNA was isolated, reverse transcribed, and measured by real-time reverse transcriptase-PCR using SYBR green as previously described.<sup>2</sup> (Life Technologies, Carlsbad, CA) (primers are listed in **Supplemental Table 1**).

#### *Histology*

Mouse liver was immersed in 4% formalin immediate after collection, embedded in paraffin, and slides cut in the usual fashion. Staining for FAH was performed using a polyclonal rabbit FAH antibody (Lucie Germain, Ph.D., Laval University), followed by use of anti-rabbit ImmPRESS polymer (Vector Laboratories), with AEC used as the chromogen. Routine hematoxylin and eosin staining was done for all samples, while separate slides were used for FAH staining.

### *Complete RNA sequencing*

Sequencing libraries were constructed using the Illumina TruSeq RNAseq kit. Briefly, poly(A)<sup>+</sup> RNA was isolated from total RNA using oligo-dT coated magnetic beads. The recovered RNA was then chemically fragmented. First strand cDNA was generated using random hexamers as primers for reverse transcriptase. Following second strand synthesis, the ends of the double stranded fragments were repaired and then a single "A" nucleotide was added to each end. Illumina adaptors were ligated to the cDNAs. Limited round PCR was used to amplify the material to yield the final library. Library concentration was determined using real time PCR with primers complementary to the Illumina adaptors. Sample libraries were diluted and applied to an Illumina paired end flow cell at a concentration appropriate to generate about 180 million reads per lane. All libraries were prepared with indexing barcodes to permit multiplex runs. 50 cycle single read sequencing were used to generate base call files. Illumina's CASAVA package was used to assemble the reads into standard fastq formatted data.

### *RNA sequencing gene set analysis*

Raw fastq data from RNA libraries was transformed into Reads Per Kilobase Million (RPKM), which allows a normalized comparison between libraries. RPKM data was analyzed using Gene Set Enrichment Analysis (GSEA) as described.<sup>3</sup> Heatmaps and hierarchical clustering used GENE-E (<http://www.broadinstitute.org/cancer/software/GENE-E/index.html>). Gene set constituents are noted in **Supplemental Table 2**). Differences in gene sets were considered significant if the false discovery rate (FDR) qvalue was < 0.05, a more stringent statistic than the p value. All differences between gene sets with an FDR qvalue < 0.05 also had p values < 0.05. Complete RNA sequencing data can be found at the NCBI GEO website, SRA198069, "FGF19 signaling controls liver size."

### *Serum and bile FGF19 measurements*

Serum and bile FGF19 concentrations were performed in triplicate with an ELISA according to the manufacturer's instructions (FGF-19 Omnikine ELISA, Assay Biotechnology). Serum ALT levels were assayed in triplicate with an ALT (SGPT) Reagent Kit (Color Endpoint) (Bio-quant, Cat # BQ 004A-CR).

### *Flow cytometry methods for isolating biliary ductal cells*

A piece of human liver explant taken from a patient undergoing liver transplant for biliary cirrhosis due to biliary atresia was perfused with EBSS (Gibco, CA) with 1mM EGTA (Fisher Chemical, NJ) and then collagenase type2 (Worthington, NJ). Hepatocytes were depleted with a spin of 800rpm for 3min. Supernatant was spun at a speed of 1400rpm for 5min, non-parenchymal cells (NPCs) were included in the pellets. Cells were incubated at 4°C for 20 minutes with FITC conjugated anti-DHIC5-4D9, APC-H7 CD45 (BD Pharmingen, CA) and APC-H7 CD14 (BD Pharmingen), Alexa 647 anti- CD31 (BD Pharmingen). Cells were washed 3 times and resuspended in staining medium containing propidium iodide (1 µg/mL) (Sigma, St Louis, MO). Labeled cells were analyzed and separated with BD Influx sorter (BD Biosciences, CA) and Flowjo software (Flowjo, OR). After removal of doublets with trigger pulse width, PI<sup>+</sup> dead cells, hematopoietic cells, macrophages and endothelial cells by CD45<sup>+</sup>CD14<sup>+</sup> and CD31<sup>+</sup> antibodies, ductal cells are purified in this cell fraction: DHIC5-4D9<sup>+</sup>CD45<sup>-</sup>CD14<sup>-</sup>CD31<sup>-</sup>.

Note that our lab uses the DHIC5-4D9/HPd3 antibody as a pan-ductal marker.<sup>4</sup> DHIC5-4D9/HPd3 co-labels cells staining for Keratin 19, another common bile duct marker.

### **References**

1. Schedl, A., *et al.* A method for the generation of YAC transgenic mice by pronuclear microinjection. *Nucleic Acids Res* **21**, 4783-4787 (1993).
2. Madison, B.B., *et al.* Cis elements of the villin gene control expression in restricted domains of the vertical (crypt) and horizontal (duodenum, cecum) axes of the intestine. *J Biol Chem* **277**, 33275-33283 (2002).
3. Subramanian, A., *et al.* Gene set enrichment analysis: a knowledge-based approach for interpreting genome-wide expression profiles. *Proc Natl Acad Sci U S A* **102**, 15545-15550 (2005).
4. Dorrell, C., *et al.* Transcriptomes of the major human pancreatic cell types. *Diabetologia* **54**, 2832-2844 (2011).

## Supplemental Tables and Figures

*Supplemental Table 1* PCR Primer List

| qPCR primer                    | Sequence (5'-3')             |
|--------------------------------|------------------------------|
| Mouse Cyp7a F (for qRT-PCR)    | TGGAATAAGGAGAAGGAAAGTA       |
| Mouse Cyp7a R (for qRT-PCR)    | TGTGTCCAAATGCCTTCGCAGA       |
| Mouse FGF15 F (for qRT-PCR)    | GAGGACCAAAACGAACGAAATT       |
| Mouse FGF15 R (for qRT-PCR)    | ACGTCCTTGATGGCAATCG          |
| Mouse Gapdh F (for qRT-PCR)    | CGACTTCAACAGCAACTC           |
| Mouse Gapdh R (for qRT-PCR)    | GTAGCCGTATTCATTGTCAT         |
| Mouse Fgf15 F (for qRT-PCR)    | GAGGACCAAAACGAACGAAATT       |
| Mouse Fgf15 R (for qRT-PCR)    | ACGTCCTTGATGGCAATCG          |
| Human FGF19 F (for qRT-PCR)    | CACGGGCTCTCCAGCTGCTTCCTGCG   |
| Human FGF19 R (for qRT-PCR)    | TCCTCCTCGAAAGCACAGTCTTCCTCCG |
| Human FGF19 F (Genomic 3' end) | CCAAACAGCGCGGGACGCTAG        |
| Human FGF19 R (Genomic 3' end) | AAGGCCCGAGGTGGGTTTTCT        |
| Human FGF19 F (Genomic 5' end) | TCCTCCCGTGGACGGTGCT          |
| Human FGF19 R (Genomic 5' end) | AGGCATGGCCCACCAGGCTT         |
| Human Lamin F (for qRT-PCR)    | CCTCCTCGCCCTCCAAGAGC         |
| Human Lamin R (for qRT-PCR)    | AGATGCGGGCAAGGATGCAG         |
| Human CYP7A F (for qRT-PCR)    | TGGATTAGGAGAAGGCAAACG        |
| Human CYP7A R (for qRT-PCR)    | TGTGCCCAAATGCCTTCGCAGA       |

*Supplemental Table 2 Gene set constituents*

| <b>Hippo Signaling</b> | <b>Bile acid Synthesis</b> | <b>Cholestasis Pathway</b> | <b>FGFR4 Ligand</b> |
|------------------------|----------------------------|----------------------------|---------------------|
| AMOT                   | ABCB11                     | ABCB11                     | FGF1                |
| AMOTL1                 | ACOT8                      | ABCC2                      | FGF17               |
| AMOTL2                 | ACOX2                      | ABCC3                      | FGF18               |
| CASP3                  | AKR1C4                     | ABCC4                      | FGF19               |
| CCND1                  | AKR1D1                     | ALB                        | FGF2                |
| CTGF                   | AMACR                      | BAAT                       | FGF20               |
| DIAPH1                 | BAAT                       | FABP6                      | FGF23               |
| DVL2                   | CH25H                      | SLC10A1                    | FGF4                |
| LATS1                  | CYP27A1                    | SLC10A2                    | FGF6                |
| LATS2                  | CYP39A1                    | SLC27A5                    | FGF8                |
| NPHP4                  | CYP46A1                    | SLCO1A2                    | FGF9                |
| SAV1                   | CYP7A1                     | SLCO1B1                    | FGFR4               |
| STK3                   | CYP7B1                     | SLCO1B3                    |                     |
| STK4                   | CYP8B1                     |                            |                     |
| TEAD1                  | HSD17B4                    |                            |                     |
| TJP1                   | HSD3B7                     |                            |                     |
| TJP2                   | SCP2                       |                            |                     |
| WWC1                   | SLC27A2                    |                            |                     |
| WWTR1                  | SLC27A5                    |                            |                     |
| YAP1                   |                            |                            |                     |
| YWHAB                  |                            |                            |                     |
| YWHAE                  |                            |                            |                     |

*Supplemental Table 2 Gene set constituents*

**DNA Replication**

|        |        |           |          |         |        |         |           |
|--------|--------|-----------|----------|---------|--------|---------|-----------|
| AHCTF1 | CENPC1 | GINS2     | MCM6     | PMF1    | PSMA4  | PSMD12  | RPA1      |
| APITD1 | CENPH  | GINS4     | MCM7     | POLA1   | PSMA5  | PSMD13  | RPA2      |
| AURKB  | CENPI  | GMNN      | MCM8     | POLA2   | PSMA6  | PSMD14  | RPA3      |
| B9D2   | CENPK  | GORASP1   | MIS12    | POLD1   | PSMA7  | PSMD2   | RPA4      |
| BIRC5  | CENPL  | INCENP    | MLF1IP   | POLD2   | PSMA8  | PSMD3   | RPS27     |
| BUB1   | CENPM  | ITGB3BP   | NDC80    | POLD3   | PSMB1  | PSMD4   | RPS27A    |
| BUB1B  | CENPN  | KIF18A    | NDEL1    | POLD4   | PSMB10 | PSMD5   | RPS27AP11 |
| BUB3   | CENPO  | KIF20A    | NSL1     | POLE    | PSMB2  | PSMD6   | SEC13     |
| CASC5  | CENPP  | KIF23     | NUDC     | POLE2   | PSMB3  | PSMD7   | SEH1L     |
| CCDC99 | CENPQ  | KIF2A     | NUF2     | PPP1CC  | PSMB4  | PSMD8   | SGOL1     |
| CCNA1  | CENPT  | KIF2B     | NUP107   | PPP2CA  | PSMB5  | PSMD9   | SGOL2     |
| CCNA2  | CKAP5  | KIF2C     | NUP133   | PPP2CB  | PSMB6  | PSME1   | SKA1      |
| CDC20  | CLASP1 | KNTC1     | NUP37    | PPP2R1A | PSMB7  | PSME2   | SKA2      |
| CDC45  | CLIP1  | LIG1      | NUP43    | PPP2R1B | PSMB8  | PSME4   | SKA2L     |
| CDC6   | DBF4   | LOC645084 | NUP85    | PPP2R5A | PSMB9  | PSMF1   | SMC1A     |
| CDC7   | DNA2   | LOC652826 | ORC1     | PPP2R5B | PSMC1  | RAD21   | SMC3      |
| CDCA8  | DSN1   | MAD1L1    | ORC2     | PPP2R5C | PSMC2  | RANBP2  | SPC24     |
| CDK2   | E2F1   | MAD2L1    | ORC3     | PPP2R5D | PSMC3  | RANGAP1 | SPC25     |
| CDKN1A | E2F2   | MAPRE1    | ORC4     | PPP2R5E | PSMC4  | RB1     | STAG1     |
| CDKN1B | E2F3   | MCM10     | ORC5     | PRIM1   | PSMC5  | RCC2    | STAG2     |
| CDT1   | ERCC6L | MCM2      | ORC6     | PRIM2   | PSMC6  | RFC2    | TAOK1     |
| CENPA  | FBXO5  | MCM3      | PAFAH1B1 | PSMA1   | PSMD1  | RFC3    | UBA52     |
| CENPC1 | FEN1   | MCM4      | PCNA     | PSMA2   | PSMD10 | RFC4    | XPO1      |
| CENPH  | GINS1  | MCM5      | PLK1     | PSMA3   | PSMD11 | RFC5    | ZW10      |
|        |        |           |          |         |        |         | ZWILCH    |
|        |        |           |          |         |        |         | ZWINT     |

*Supplemental Table 2 Gene set constituents*

**Apoptosis**

|          |        |          |        |        |           |
|----------|--------|----------|--------|--------|-----------|
| ACIN1    | CASP9  | FNTA     | PLEC   | PSMC2  | RIPK1     |
| ADD1     | CDH1   | GAS2     | PMAIP1 | PSMC3  | ROCK1     |
| AKT1     | CFLAR  | GSN      | PPP3R1 | PSMC4  | RPS27A    |
| APAF1    | CTNNB1 | GZMB     | PRKCD  | PSMC5  | SATB1     |
| APC      | CYCS   | H1FO     | PRKCQ  | PSMC6  | SPTAN1    |
| APPL1    | DAPK1  | HIST1H1A | PSMA1  | PSMD1  | STK24     |
| ARHGAP10 | DAPK2  | HIST1H1B | PSMA2  | PSMD10 | TFDP1     |
| BAD      | DAPK3  | HIST1H1C | PSMA3  | PSMD11 | TJP1      |
| BAK1     | DBNL   | HIST1H1D | PSMA4  | PSMD12 | TJP2      |
| BAX      | DCC    | HIST1H1E | PSMA5  | PSMD13 | TNF       |
| BBC3     | DFFA   | HMGB1    | PSMA6  | PSMD14 | TNFRSF10B |
| BCAP31   | DFFB   | HMGB2    | PSMA7  | PSMD2  | TNFRSF1A  |
| BCL2     | DIABLO | KPNA1    | PSMA8  | PSMD3  | TNFSF10   |
| BCL2L1   | DNM1L  | KPNB1    | PSMB1  | PSMD4  | TP53      |
| BCL2L11  | DSG1   | LMNA     | PSMB10 | PSMD5  | TRADD     |
| BID      | DSG2   | LMNB1    | PSMB2  | PSMD6  | TRAF2     |
| BIRC2    | DSG3   | MAGED1   | PSMB3  | PSMD7  | UBA52     |
| BMF      | DSP    | MAPK8    | PSMB4  | PSMD8  | UNC5A     |
| BMX      | DYNLL1 | MAPT     | PSMB5  | PSMD9  | UNC5B     |
| CASP10   | DYNLL2 | MST4     | PSMB6  | PSME1  | VIM       |
| CASP3    | E2F1   | NMT1     | PSMB7  | PSME2  | XIAP      |
| CASP6    | FADD   | OCLN     | PSMB8  | PSME4  | YWHAB     |
| CASP7    | FAS    | PAK2     | PSMB9  | PSMF1  |           |
| CASP8    | FASLG  | PKP1     | PSMC1  | PTK2   |           |



Supplemental Table 2 Gene set constituents

Cell Cycle

|         |          |         |           |            |          |         |         |         |         |
|---------|----------|---------|-----------|------------|----------|---------|---------|---------|---------|
| ACD     | CDC20    | CEP250  | GIN51     | HIST2H2AA3 | MCM8     | POLE2   | PSMC5   | RPA2    | TFDP1   |
| ACTR1A  | CDC23    | CEP290  | GIN52     | HIST2H2AA4 | MDM2     | POT1    | PSMC6   | RPA3    | TINF2   |
| AHCTF1  | CDC25A   | CEP57   | GIN54     | HIST2H2AC  | MIS12    | PPP1CC  | PSMD1   | RPA4    | TK2     |
| AKAP9   | CDC25B   | CEP63   | GMNN      | HIST2H2BE  | MLF1P    | PPP2CA  | PSMD10  | RPS27   | TP53    |
| ALMS1   | CDC25C   | CEP70   | GORASP1   | HIST2H4A   | MNAT1    | PPP2CB  | PSMD11  | RPS27A  | TUBA1A  |
| ANAPC1  | CDC26    | CEP72   | H2AFX     | HIST2H4B   | MYBL2    | PPP2R1A | PSMD12  | RRM2    | TUBA4A  |
| ANAPC10 | CDC27    | CEP76   | H2AFZ     | HIST3H2BB  | MYC      | PPP2R1B | PSMD13  | RSF1    | TUBB    |
| ANAPC11 | CDC45    | CETN2   | HAUS2     | HIST3H3    | NDC80    | PPP2R2A | PSMD14  | RUVBL1  | TUBG1   |
| ANAPC2  | CDC6     | CHEK1   | HDAC1     | HIST4H4    | NDEL1    | PPP2R3B | PSMD2   | RUVBL2  | TUBG2   |
| ANAPC4  | CDC7     | CHEK2   | HIST1H2AB | HJURP      | NEDD1    | PPP2R5A | PSMD3   | SDCCAG8 | TUBGCP2 |
| ANAPC5  | CDCA8    | CKAP5   | HIST1H2AC | HSP90AA1   | NEK2     | PPP2R5B | PSMD4   | SEC13   | TUBGCP3 |
| ANAPC7  | CDK1     | CKS1B   | HIST1H2AD | HSPA2      | NHP2     | PPP2R5C | PSMD5   | SEH1L   | TUBGCP5 |
| APITD1  | CDK2     | CLASP1  | HIST1H2AE | HUS1       | NINL     | PPP2R5D | PSMD6   | SGOL1   | TUBGCP6 |
| ATM     | CDK4     | CLIP1   | HIST1H2AJ | INCENP     | NPM1     | PPP2R5E | PSMD7   | SGOL2   | TYMS    |
| ATR     | CDK5RAP2 | CSNK1D  | HIST1H2BA | ITGB3BP    | NSL1     | PRIM1   | PSMD8   | SKA1    | UBA52   |
| ATRIP   | CDK6     | CSNK1E  | HIST1H2BB | KIF18A     | NUDC     | PRIM2   | PSMD9   | SKA2    | UBE2C   |
| AURKA   | CDK7     | CUL1    | HIST1H2BC | KIF20A     | NUF2     | PRKACA  | PSME1   | SKP1    | UBE2D1  |
| AURKB   | CDKN1A   | DBF4    | HIST1H2BD | KIF23      | NUMA1    | PRKAR2B | PSME2   | SKP2    | UBE2E1  |
| AZI1    | CDKN1B   | DCTN1   | HIST1H2BE | KIF2A      | NUP107   | PSMA1   | PSME4   | SMARCA5 | UBE2I   |
| B9D2    | CDKN2A   | DCTN2   | HIST1H2BF | KIF2B      | NUP133   | PSMA2   | PSMF1   | SMC1A   | WEE1    |
| BIRC5   | CDKN2B   | DCTN3   | HIST1H2BG | KIF2C      | NUP37    | PSMA3   | PTTG1   | SMC1B   | WRAP53  |
| BRCA1   | CDKN2C   | DHFR    | HIST1H2BH | KNTC1      | NUP43    | PSMA4   | RAD1    | SMC3    | XPO1    |
| BTRC    | CDKN2D   | DIDO1   | HIST1H2BI | LIG1       | NUP85    | PSMA5   | RAD17   | SPC24   | YWHAE   |
| BUB1    | CDT1     | DKC1    | HIST1H2BJ | LIN37      | OFD1     | PSMA6   | RAD21   | SPC25   | YWHAG   |
| BUB1B   | CENPA    | DNA2    | HIST1H2BK | LIN52      | OIP5     | PSMA7   | RAD9A   | SSNA1   | ZW10    |
| BUB3    | CENPC1   | DSN1    | HIST1H2BL | LIN54      | PAFAH1B1 | PSMA8   | RANBP2  | STAG1   | ZWILCH  |
| CASC5   | CENPH    | DYNC1H1 | HIST1H2BM | LIN9       | PCM1     | PSMB1   | RANGAP1 | STAG2   | ZWINT   |
| CCDC99  | CENPI    | DYNC1I2 | HIST1H2BN | LMNA       | PCNA     | PSMB10  | RB1     | STAG3   |         |
| CCNA1   | CENPJ    | DYNLL1  | HIST1H2BO | LMNB1      | PCNT     | PSMB2   | RBBP4   | SUN2    |         |
| CCNA2   | CENPK    | DYRK1A  | HIST1H4A  | MAD1L1     | PKMYT1   | PSMB3   | RBBP7   | SYCP1   |         |
| CCNB1   | CENPL    | E2F1    | HIST1H4B  | MAD2L1     | PLK1     | PSMB4   | RBL1    | SYCP2   |         |
| CCNB2   | CENPM    | E2F2    | HIST1H4C  | MAPRE1     | PLK4     | PSMB5   | RBL2    | SYCP3   |         |
| CCND1   | CENPN    | E2F3    | HIST1H4D  | MAX        | PMF1     | PSMB6   | RCC2    | SYNE1   |         |
| CCND2   | CENPO    | E2F4    | HIST1H4E  | MCM10      | POLA1    | PSMB7   | REC8    | SYNE2   |         |
| CCND3   | CENPP    | E2F5    | HIST1H4F  | MCM2       | POLA2    | PSMB8   | RFC2    | TAOK1   |         |
| CCNE1   | CENPQ    | ERCC6L  | HIST1H4H  | MCM3       | POLD1    | PSMB9   | RFC3    | TERF1   |         |
| CCNE2   | CENPT    | FBXO5   | HIST1H4I  | MCM4       | POLD2    | PSMC1   | RFC4    | TERF2   |         |
| CCNH    | CEP135   | FEN1    | HIST1H4J  | MCM5       | POLD3    | PSMC2   | RFC5    | TERF2IP |         |
| CDC14A  | CEP164   | FGFR1OP | HIST1H4K  | MCM6       | POLD4    | PSMC3   | RFWD2   | TERT    |         |
| CDC16   | CEP192   | FKBP6   | HIST1H4L  | MCM7       | POLE     | PSMC4   | RPA1    | TEX12   |         |

*Supplemental Table 2 Gene set constituents*

| <b>FOXM1</b>   |           | <b>WNT</b>       | <b>IL6</b>     | <b>PTEN</b>      |
|----------------|-----------|------------------|----------------|------------------|
| <b>Pathway</b> |           | <b>Signaling</b> | <b>Pathway</b> | <b>Signaling</b> |
| AURKB          | HIST1H2BA | APC              | CEBPB          | AKT1             |
| BIRC5          | LAMA4     | AXIN1            | CSNK2A1        | BCAR1            |
| BRCA2          | MAP2K1    | BTRC             | ELK1           | CDKN1B           |
| CCNA2          | MMP2      | CCND1            | FOS            | FASLG            |
| CCNB1          | MYC       | CREBBP           | GRB2           | FOXO3            |
| CCNB2          | NEK2      | CSNK1A1          | HRAS           | GRB2             |
| CCND1          | NFATC3    | CSNK1D           | IL6            | ILK              |
| CCNE1          | ONECUT1   | CSNK2A1          | IL6R           | ITGB1            |
| CDC25B         | PLK1      | CTBP1            | IL6ST          | MAPK1            |
| CDK1           | RB1       | CTNNB1           | JAK1           | MAPK3            |
| CDK2           | SKP2      | DVL1             | JAK2           | PDK2             |
| CDK4           | SP1       | FRAT1            | JAK3           | PDPK1            |
| CDKN2A         | TGFA      | FZD1             | JUN            | PIK3CA           |
| CENPA          | XRCC1     | GSK3B            | MAP2K1         | PIK3R1           |
| CENPB          |           | HDAC1            | MAPK3          | PTEN             |
| CENPF          |           | LEF1             | PTPN11         | PTK2             |
| CHEK2          |           | MAP3K7           | RAF1           | SHC1             |
| CKS1B          |           | MYC              | SHC1           | SOS1             |
| CREBBP         |           | NLK              | SOS1           |                  |
| EP300          |           | PPARD            | SRF            |                  |
| ESR1           |           | PPP2CA           | STAT3          |                  |
| ETV5           |           | SMAD4            | TYK2           |                  |
| FOS            |           | TAB1             |                |                  |
| FOXM1          |           | TLE1             |                |                  |
| GAS1           |           | WIF1             |                |                  |
| GSK3A          |           | WNT1             |                |                  |

*Supplemental Table 2 Gene set constituents*

| <b>MYC</b>     |          | <b>MET</b>     |         |
|----------------|----------|----------------|---------|
| <b>Pathway</b> |          | <b>Pathway</b> |         |
| ACTL6A         | MYC      | AKT1           | MTOR    |
| BAX            | MYCT1    | AKT1S1         | MUC20   |
| BCAT1          | NBN      | AKT2           | NCK1    |
| BIRC5          | NCL      | APC            | NCK2    |
| BMI1           | NDUFAF2  | ARF6           | NUMB    |
| CAD            | NME1     | ARHGEF4        | PAK1    |
| CCNB1          | NME2     | BAD            | PAK2    |
| CCND2          | NPM1     | BCAR1          | PAK4    |
| CDC25A         | ODC1     | CBL            | PARD6A  |
| CDCA7          | PDCD10   | CDC42          | PDPK1   |
| CDK4           | PEG10    | CDH1           | PIK3CA  |
| CREBBP         | PFKM     | CRK            | PIK3R1  |
| DDX18          | PIM1     | CRKL           | PLCG1   |
| E2F3           | PMAIP1   | CTNNA1         | PRKCI   |
| EIF2S1         | POLR3D   | CTNNB1         | PRKCZ   |
| EIF4A1         | PRDX3    | EGR1           | PTK2    |
| EIF4E          | PTMA     | EIF4E          | PTPN1   |
| EIF4G1         | RCC1     | EIF4EBP1       | PTPN11  |
| ENO1           | RPL11    | EPS15          | PTPN2   |
| EP300          | RUVBL1   | ETS1           | PTPRJ   |
| FOSL1          | RUVBL2   | F2RL2          | PXN     |
| GAPDH          | SERPINI1 | GAB1           | RAB5A   |
| GPAM           | SHMT1    | GAB2           | RAC1    |
| HMGA1          | SLC2A1   | GRB2           | RAF1    |
| HSP90AA1       | SMAD3    | HGF            | RANBP10 |
| HSPA4          | SMAD4    | HGS            | RANBP9  |
| HSPD1          | SNAI1    | HRAS           | RAP1A   |
| HUWE1          | SUPT3H   | INPP5D         | RAP1B   |
| ID2            | SUPT7L   | INPPL1         | RAPGEF1 |
| IREB2          | TAF10    | JUN            | RHOA    |
| KAT2A          | TAF12    | KPNB1          | RIN2    |
| KAT5           | TAF4B    | MAP2K1         | RPTOR   |
| KIR3DL1        | TAF9     | MAP2K2         | SH3GL2  |
| LDHA           | TERT     | MAP2K4         | SH3KBP1 |
| LIN28B         | TFRC     | MAP3K1         | SHC1    |
| MAX            | TK1      | MAPK1          | SNAI1   |
| MINA           | TP53     | MAPK3          | SOS1    |
| MMP9           | TRRAP    | MAPK8          | SRC     |
| MTA1           | UBTF     | MET            | WASL    |

**Title:** FGF signaling controls liver size in humanized chimeras

### **Supplemental Figure Legends**

**Supplemental Figure 1:** Insertion of human DNA into mouse genome. **(a)** Bacterial artificial chromosome (BAC) RP11-266K14 with ~164 kb human DNA (chromosome 11) with genomic FGF19 sequence in the middle was introduced as a transgene into FRGN mice. A strategy using different PCR primer pairs was used to confirm the presence of the entire BAC in the transgenic mouse. **(b)** Example of PCR used to confirm presence of human DNA presence in transgenic mouse genome but not non-transgenic littermates. **(c)** Schematic view of the BAC used showing the relative positions of two other full coding sequences. **(d)** RNA sequence data showing RNA expression of the 3 human genes contained within the BAC in 3 conditions. Also shown are the orthologous murine genes in the transgenic and non-transgenic mice in the noted conditions. For the control and bile duct ligation (BDL) data, one transgenic and one non-transgenic mouse was used for each dataset. For the repopulated data, 3 mice for each genotype was used.

**Supplemental Figure 2:** DNA replication, cell cycle, apoptosis transcription pathways. Analysis of transcriptional pathways from RNA sequencing data (human transcriptome only) from liver tissue of human hepatocyte repopulated mice, either FR19- (n = 3) or FRGN19+ (n = 3) mice; statistics generated through GSEA showed that DNA replication and cell cycle pathways were significantly activated in repopulated livers of FRGN19- compared to FRGN19+ mice, while there was no difference in apoptosis-associated gene expression.

**Supplemental Figure 3:** Liver growth and regeneration transcription pathways. Analysis of transcriptional pathways from RNA sequencing data (human transcriptome only) from liver tissue of human hepatocyte repopulated mice, either FRGN19- (n = 3) or FRGN19+ (n = 3) mice; statistics generated through GSEA showing that the FOXM1 transcription pathway was significantly activated in repopulated livers of FRGN19- compared to FRGN19+ mice, while there were no significant differences other pathways commonly associated with liver growth and regeneration. Western blotting for FoxM1 protein showed that FoxM1 was mildly elevated in FRGN19- fully repopulated mice, but not significantly detected in fully repopulated FRGN19+ mice. FoxM1 was significantly expressed in "Actively Repopulating" livers (2 months

after human hepatocyte transplantation, prior to full repopulation) in mice of both genotypes (each lane represents a different mouse).

**Supplemental Figure 4:** RNA sequence data from human hepatocytes in FRGN and FRGN<sup>19+</sup> mice. Depictions of single gene expression from RNA sequence data of single-donor human hepatocyte repopulated FRGN<sup>19-</sup> or FRGN<sup>19+</sup> mice (n = 3 each); comparison made to human liver tissue (n = 1) and isolated human hepatocytes (n = 1); statistics (two-tailed t-test) compare only the transplanted human hepatocytes (n = 3 each). Y axis refers to Reads Per Kilobase Million (RPKM), used to normalize samples. The TGR<sub>5</sub> graph under "Bile acid metabolism" also includes RNA sequence data from one gallbladder from an FRGN<sup>19+</sup> mouse that had undergone BDL for 7 days.

**Supplemental Figure 5:** Subset of genes in the whole liver (a) and intestine (be) from mice with PV infusion of bile acids showing normal physiological response to excess bile acids in both tissues.

# S1 Generation of transgenic mice with human FGF19

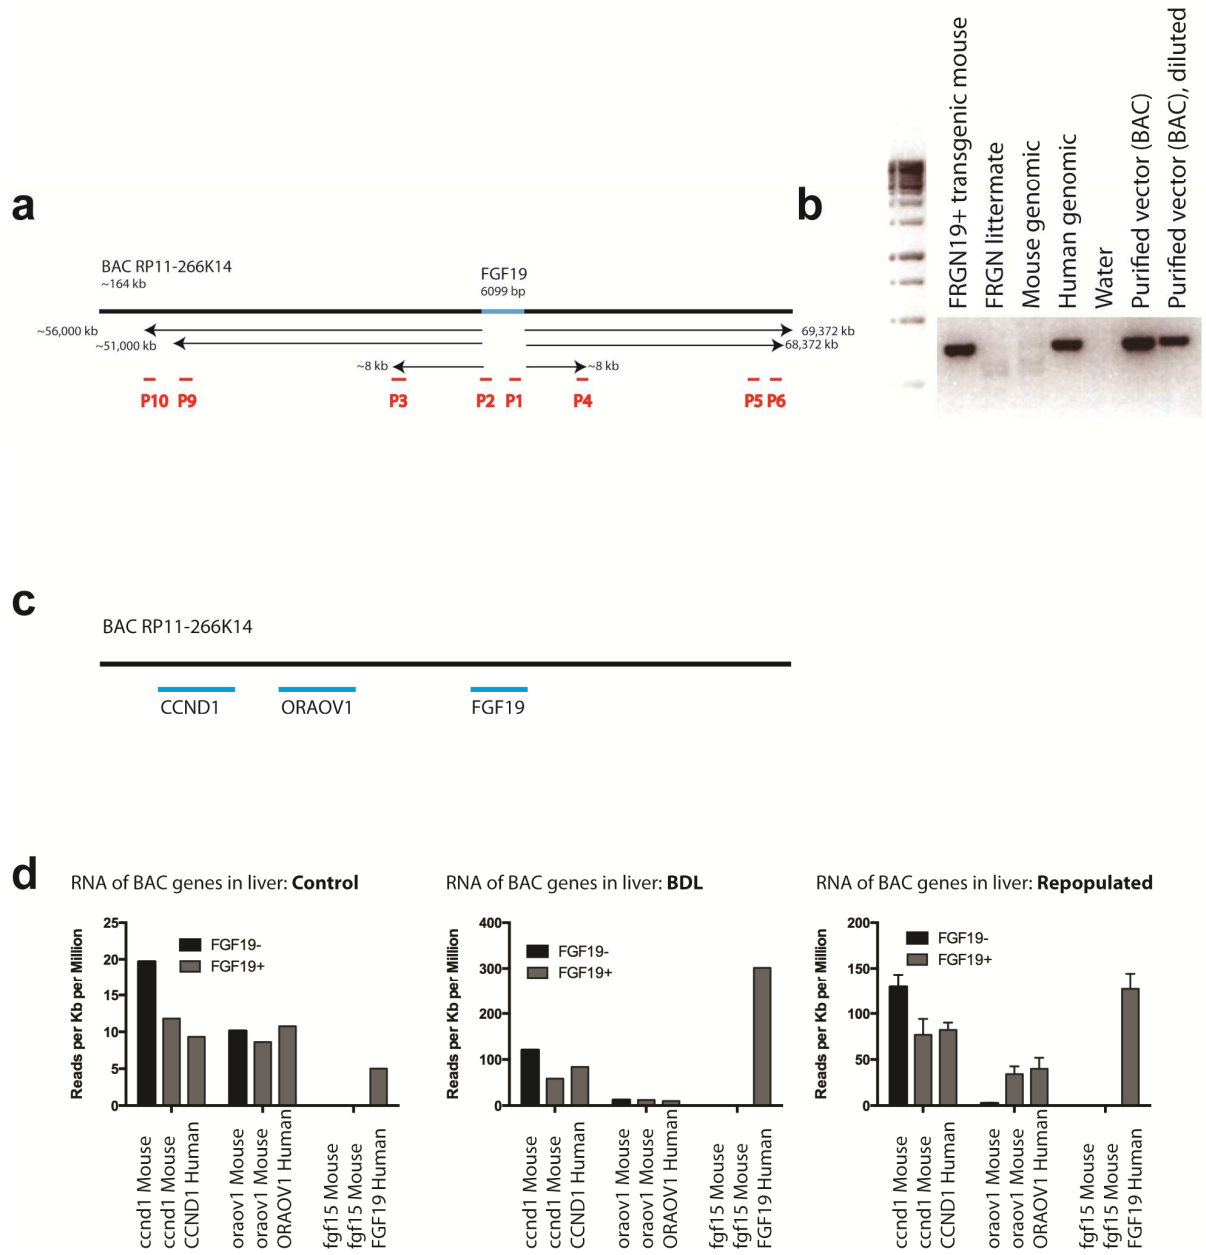

# S2 DNA replication, cell cycle, apoptosis transcription pathways

## DNA

### replication

FRGN FRGN19+

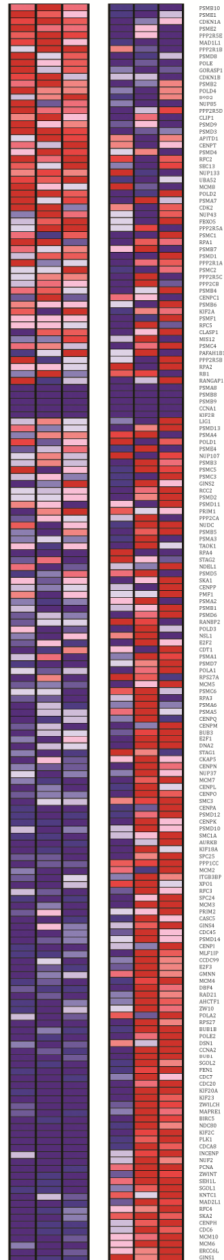

Nominal p value <0.001  
FDR q-value <0.001

### Cell cycle

FRGN FRGN19+

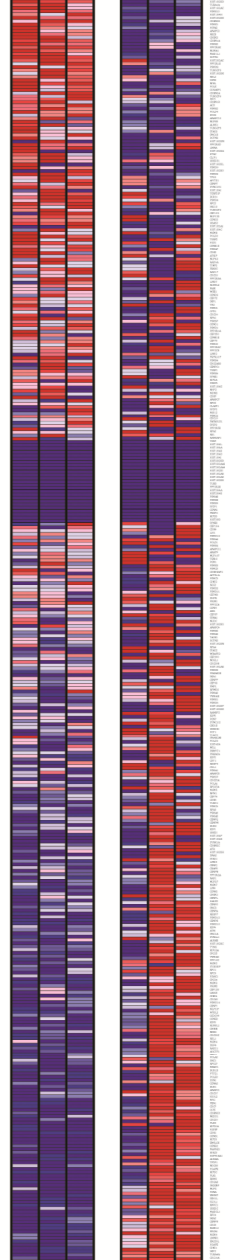

Nominal p value <0.001  
FDR q-value =0.002

### Apoptosis

FRGN FRGN19+

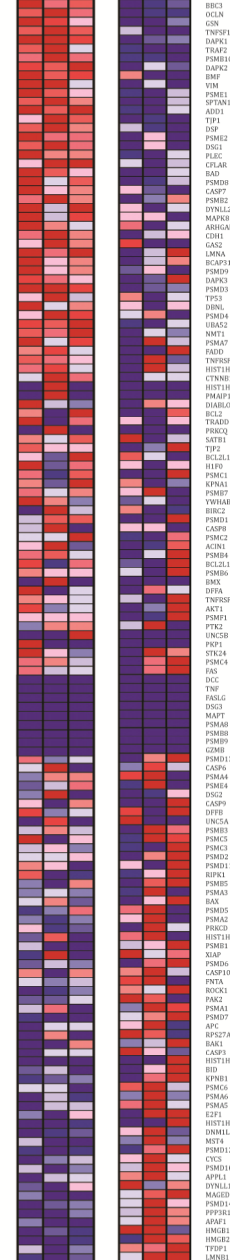

Nominal p value =0.380  
FDR q-value = 0.774

PSM20  
 CENL  
 FSC2  
 FSC3  
 MAD1L1  
 FSC5B  
 FSC5D  
 FSC6  
 FSC8  
 FSC9  
 FSC10  
 FSC11  
 FSC12  
 FSC13  
 FSC14  
 FSC15  
 FSC16  
 FSC17  
 FSC18  
 FSC19  
 FSC20  
 FSC21  
 FSC22  
 FSC23  
 FSC24  
 FSC25  
 FSC26  
 FSC27  
 FSC28  
 FSC29  
 FSC30  
 FSC31  
 FSC32  
 FSC33  
 FSC34  
 FSC35  
 FSC36  
 FSC37  
 FSC38  
 FSC39  
 FSC40  
 FSC41  
 FSC42  
 FSC43  
 FSC44  
 FSC45  
 FSC46  
 FSC47  
 FSC48  
 FSC49  
 FSC50  
 FSC51  
 FSC52  
 FSC53  
 FSC54  
 FSC55  
 FSC56  
 FSC57  
 FSC58  
 FSC59  
 FSC60  
 FSC61  
 FSC62  
 FSC63  
 FSC64  
 FSC65  
 FSC66  
 FSC67  
 FSC68  
 FSC69  
 FSC70  
 FSC71  
 FSC72  
 FSC73  
 FSC74  
 FSC75  
 FSC76  
 FSC77  
 FSC78  
 FSC79  
 FSC80  
 FSC81  
 FSC82  
 FSC83  
 FSC84  
 FSC85  
 FSC86  
 FSC87  
 FSC88  
 FSC89  
 FSC90  
 FSC91  
 FSC92  
 FSC93  
 FSC94  
 FSC95  
 FSC96  
 FSC97  
 FSC98  
 FSC99  
 FSC100  
 FSC101  
 FSC102  
 FSC103  
 FSC104  
 FSC105  
 FSC106  
 FSC107  
 FSC108  
 FSC109  
 FSC110  
 FSC111  
 FSC112  
 FSC113  
 FSC114  
 FSC115  
 FSC116  
 FSC117  
 FSC118  
 FSC119  
 FSC120  
 FSC121  
 FSC122  
 FSC123  
 FSC124  
 FSC125  
 FSC126  
 FSC127  
 FSC128  
 FSC129  
 FSC130  
 FSC131  
 FSC132  
 FSC133  
 FSC134  
 FSC135  
 FSC136  
 FSC137  
 FSC138  
 FSC139  
 FSC140  
 FSC141  
 FSC142  
 FSC143  
 FSC144  
 FSC145  
 FSC146  
 FSC147  
 FSC148  
 FSC149  
 FSC150  
 FSC151  
 FSC152  
 FSC153  
 FSC154  
 FSC155  
 FSC156  
 FSC157  
 FSC158  
 FSC159  
 FSC160  
 FSC161  
 FSC162  
 FSC163  
 FSC164  
 FSC165  
 FSC166  
 FSC167  
 FSC168  
 FSC169  
 FSC170  
 FSC171  
 FSC172  
 FSC173  
 FSC174  
 FSC175  
 FSC176  
 FSC177  
 FSC178  
 FSC179  
 FSC180  
 FSC181  
 FSC182  
 FSC183  
 FSC184  
 FSC185  
 FSC186  
 FSC187  
 FSC188  
 FSC189  
 FSC190  
 FSC191  
 FSC192  
 FSC193  
 FSC194  
 FSC195  
 FSC196  
 FSC197  
 FSC198  
 FSC199  
 FSC200  
 FSC201  
 FSC202  
 FSC203  
 FSC204  
 FSC205  
 FSC206  
 FSC207  
 FSC208  
 FSC209  
 FSC210  
 FSC211  
 FSC212  
 FSC213  
 FSC214  
 FSC215  
 FSC216  
 FSC217  
 FSC218  
 FSC219  
 FSC220  
 FSC221  
 FSC222  
 FSC223  
 FSC224  
 FSC225  
 FSC226  
 FSC227  
 FSC228  
 FSC229  
 FSC230  
 FSC231  
 FSC232  
 FSC233  
 FSC234  
 FSC235  
 FSC236  
 FSC237  
 FSC238  
 FSC239  
 FSC240  
 FSC241  
 FSC242  
 FSC243  
 FSC244  
 FSC245  
 FSC246  
 FSC247  
 FSC248  
 FSC249  
 FSC250  
 FSC251  
 FSC252  
 FSC253  
 FSC254  
 FSC255  
 FSC256  
 FSC257  
 FSC258  
 FSC259  
 FSC260  
 FSC261  
 FSC262  
 FSC263  
 FSC264  
 FSC265  
 FSC266  
 FSC267  
 FSC268  
 FSC269  
 FSC270  
 FSC271  
 FSC272  
 FSC273  
 FSC274  
 FSC275  
 FSC276  
 FSC277  
 FSC278  
 FSC279  
 FSC280  
 FSC281  
 FSC282  
 FSC283  
 FSC284  
 FSC285  
 FSC286  
 FSC287  
 FSC288  
 FSC289  
 FSC290  
 FSC291  
 FSC292  
 FSC293  
 FSC294  
 FSC295  
 FSC296  
 FSC297  
 FSC298  
 FSC299  
 FSC300





# S4 RNA sequence data from human hepatocytes in FRGN and FRGN19+ mice

## a Bile acid metabolism

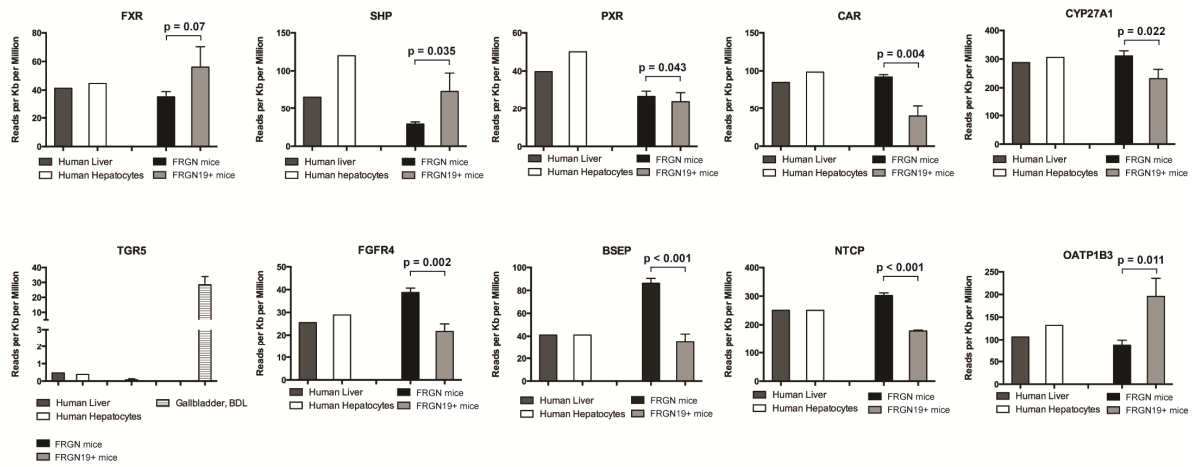

## b Lipoprotein metabolism

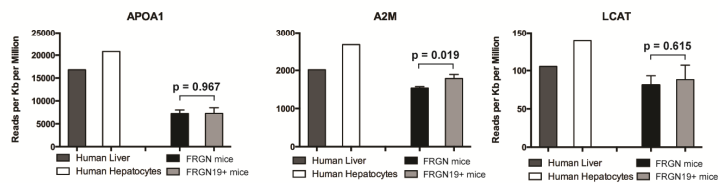

## c Amino acid metabolism

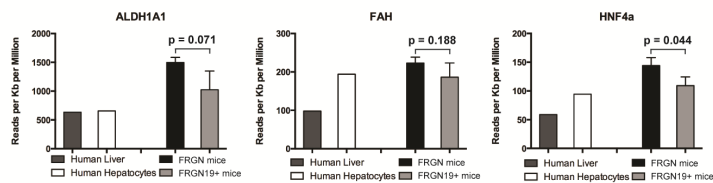

## d Glucose metabolism

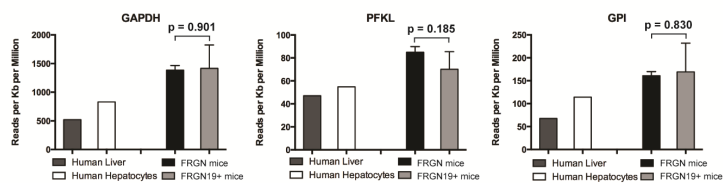

## e Coagulation

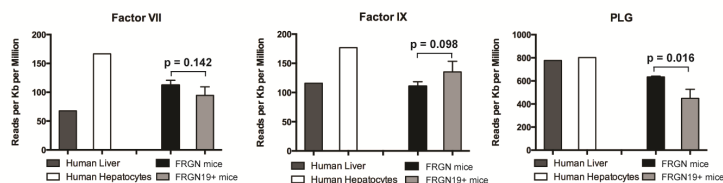

## f Drug metabolism

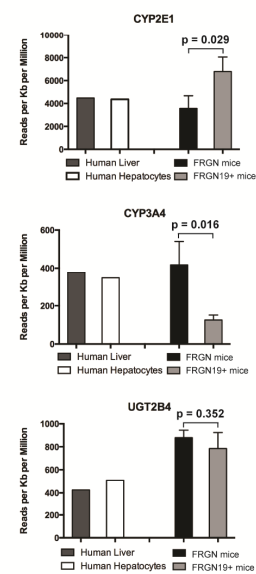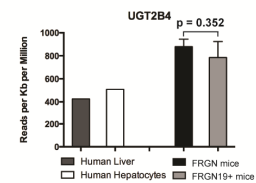

# S5 Normal physiological response to bile acids in FRGN19+ mice

## a Physiological gene regulation: liver

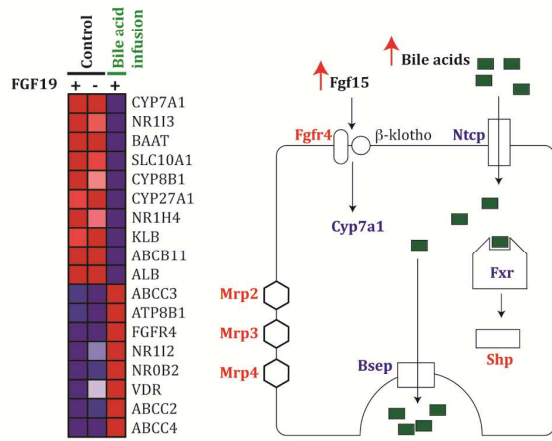

## b Physiological gene regulation: intestine

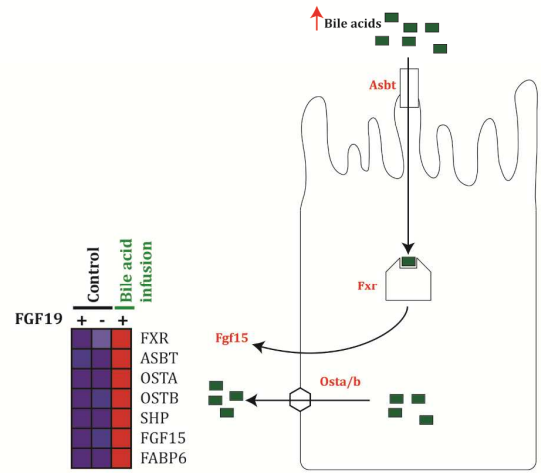

# S6 Physiologic compartments of bile acid pool

**a** Portal vein bile acid concentration

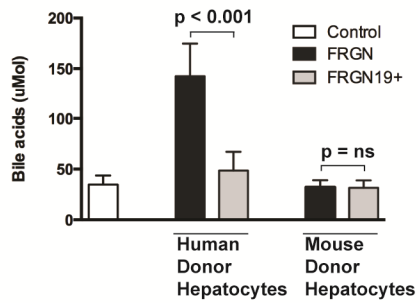

**b** Systemic bile acid concentration

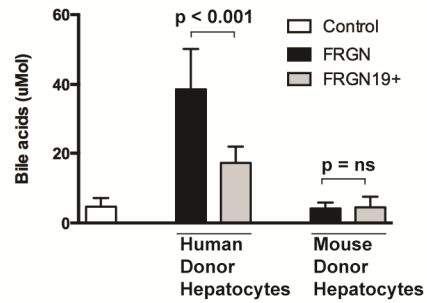

**c** Hepatic bile acid concentration

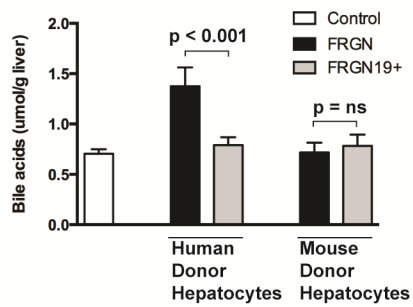

# S7 Bile acid activation upstream of YAP signaling

## a IQGAP1 in mice with bile acid excess

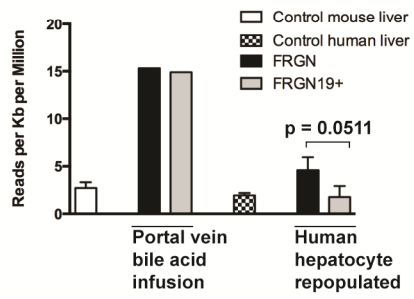

Supplement: NIHMS695651-supplement-01.pdf [file NIHMS695651-supplement-01.pdf]
